# Supplementary material
Source: PubMed Central journal article supplement (PMC8522782)
Supplement: aac.01063-21-s0001.pdf [file aac.01063-21-s0001.pdf]

## *Supplementary Materials*

### **Supplementary Figure legends**

#### **Supplementary Figure 1.** SCTA01 structure

The structure formula of SCTA01, a novel IgG1 antibody, is  $C_{6458}H_{9988}N_{1732}O_{2026}S_{42}$ , with a LALA Fc modification.

**Supplementary Figure 2.** Correlations of natural log (Ln)-transformed SCTA01 doses with pharmacokinetic parameters  $C_{max}$  (A) and  $AUC_{0-t}$  (B) of SCTA01.

**Supplementary Table 1.** Number of treatment-related adverse events experienced in participants receiving SCTA01 or placebo within the 84 days

|                                                         | SCTA01 dose       |                    |                    |                    | Total              |                    |
|---------------------------------------------------------|-------------------|--------------------|--------------------|--------------------|--------------------|--------------------|
|                                                         | 5mg/kg<br>(N = 3) | 15mg/kg<br>(N = 6) | 30mg/kg<br>(N = 8) | 50mg/kg<br>(N = 8) | SCTA01<br>(N = 25) | Placebo<br>(N = 8) |
| <b>Any adverse event*</b>                               | 4                 | 5                  | 13                 | 7                  | 29                 | 5                  |
| <b>Any adverse event of <math>\geq</math> grade 3</b>   | 0                 | 0                  | 0                  | 0                  | 0                  | 0                  |
| <b>Laboratory investigations*</b>                       | 4                 | 4                  | 12                 | 4                  | 24                 | 5                  |
| Increased conjugated bilirubin                          | 1                 | 0                  | 3                  | 1                  | 5                  | 0                  |
| Increased unconjugated bilirubin                        | 1                 | 0                  | 2                  | 1                  | 4                  | 1                  |
| Increased blood bilirubin                               | 1                 | 0                  | 3                  | 0                  | 4                  | 0                  |
| Increased alanine aminotransferase                      | 0                 | 1                  | 0                  | 0                  | 1                  | 0                  |
| Increased aspartate aminotransferase                    | 0                 | 0                  | 0                  | 0                  | 0                  | 1                  |
| Decreased neutrophil count                              | 0                 | 0                  | 1                  | 0                  | 1                  | 0                  |
| Decreased lymphocyte count                              | 0                 | 0                  | 0                  | 0                  | 0                  | 1                  |
| Increased fibrin D dimer                                | 0                 | 0                  | 1                  | 0                  | 1                  | 0                  |
| Increased platelet count                                | 0                 | 0                  | 1                  | 0                  | 1                  | 0                  |
| Decreased fibrinogen                                    | 0                 | 0                  | 1                  | 0                  | 1                  | 0                  |
| Increased potassium                                     | 0                 | 0                  | 0                  | 1                  | 1                  | 0                  |
| Increased white blood cell count in the urine           | 0                 | 0                  | 0                  | 1                  | 1                  | 1                  |
| Protein in urine                                        | 1                 | 1                  | 0                  | 0                  | 2                  | 0                  |
| Prolonged QT interval                                   | 0                 | 2                  | 0                  | 0                  | 2                  | 0                  |
| Decreased diastolic blood pressure                      | 0                 | 0                  | 0                  | 0                  | 0                  | 1                  |
| <b>Respiratory, thoracic and mediastinal disorders*</b> | 0                 | 0                  | 0                  | 2                  | 2                  | 0                  |
| Epistaxis                                               | 0                 | 0                  | 0                  | 2                  | 2                  | 0                  |
| <b>Cardiac disorders</b>                                | 0                 | 1                  | 0                  | 0                  | 1                  | 0                  |
| Sinus bradycardia                                       | 0                 | 1                  | 0                  | 0                  | 1                  | 0                  |
| <b>Skin and subcutaneous tissue disorders</b>           | 0                 | 0                  | 0                  | 1                  | 1                  | 0                  |
| Rash                                                    | 0                 | 0                  | 0                  | 1                  | 1                  | 0                  |
| <b>Renal and urinary disorders</b>                      | 0                 | 0                  | 1                  | 0                  | 1                  | 0                  |
| Hematuria                                               | 0                 | 0                  | 1                  | 0                  | 1                  | 0                  |

Data are presented as the number of TRAEs; \*some AEs developed in the same participants.

**Supplementary Table 2.** Dose proportional pharmacokinetic properties following intravenous infusion of SCTA01

| <b>PK parameters</b>    | <b>Dose range (mg/kg)</b> | <b>n</b> | <b>Slope (<math>\beta_1</math>)</b> | <b>90% CI</b>    |
|-------------------------|---------------------------|----------|-------------------------------------|------------------|
| Ln ( $C_{max}$ )        | 5-50                      | 25       | 1.0720                              | (1.0159, 1.1281) |
| Ln ( $AUC_{0-t}$ )      | 5-50                      | 25       | 0.9854                              | (0.9285, 1.0422) |
| Ln ( $AUC_{0-\infty}$ ) | 5-50                      | 25       | 0.9645                              | (0.8948, 1.0341) |
| Ln ( $AUC_{0-28d}$ )    | 5-50                      | 25       | 1.0205                              | (0.9746, 1.0664) |

Ln, log-transformed;  $C_{max}$ , maximum concentration; AUC, area under the concentration-time curve;  $AUC_{0-t}$ , AUC from 0 to the time of last quantifiable concentration;  $AUC_{0-\infty}$ , AUC from 0 to infinity;  $AUC_{0-28d}$ : AUC from 0 to day 28

SCTA01

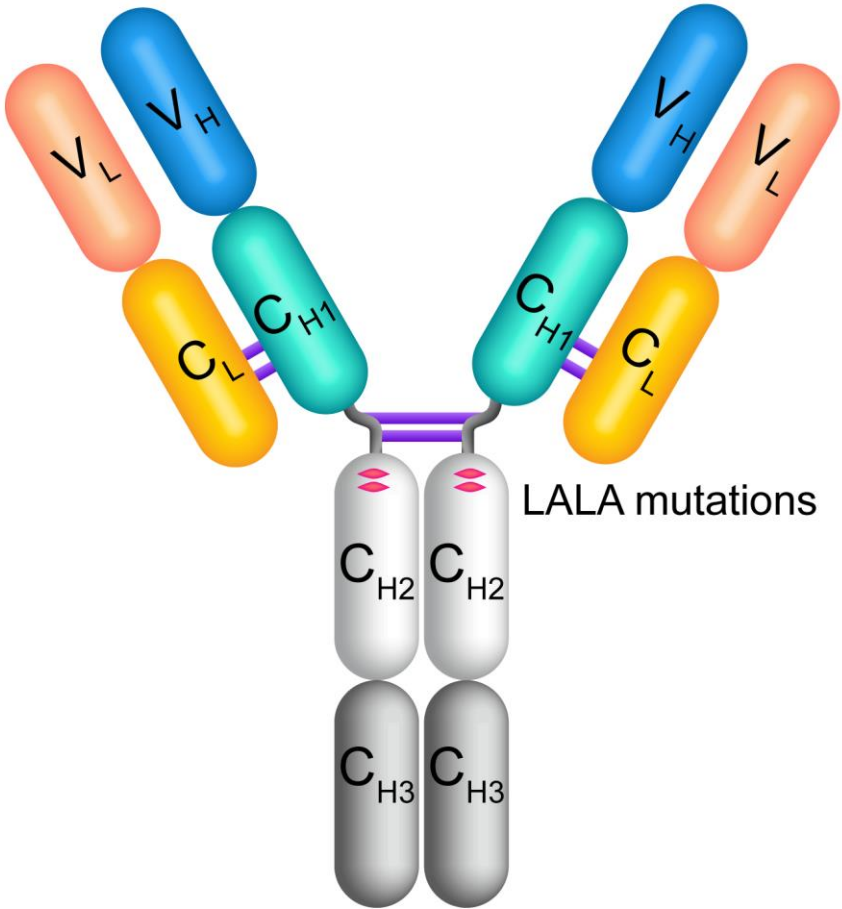

Supplementary Figure 1

**A**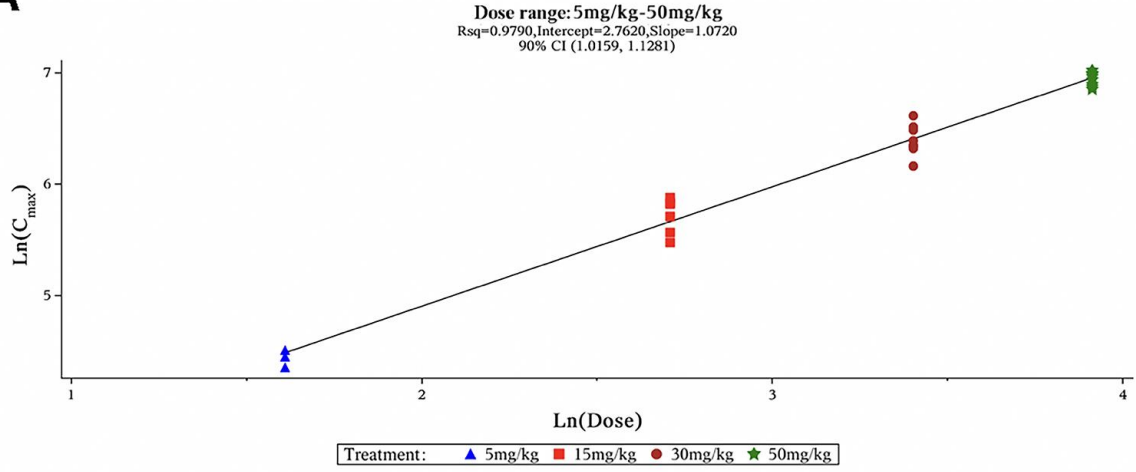**B**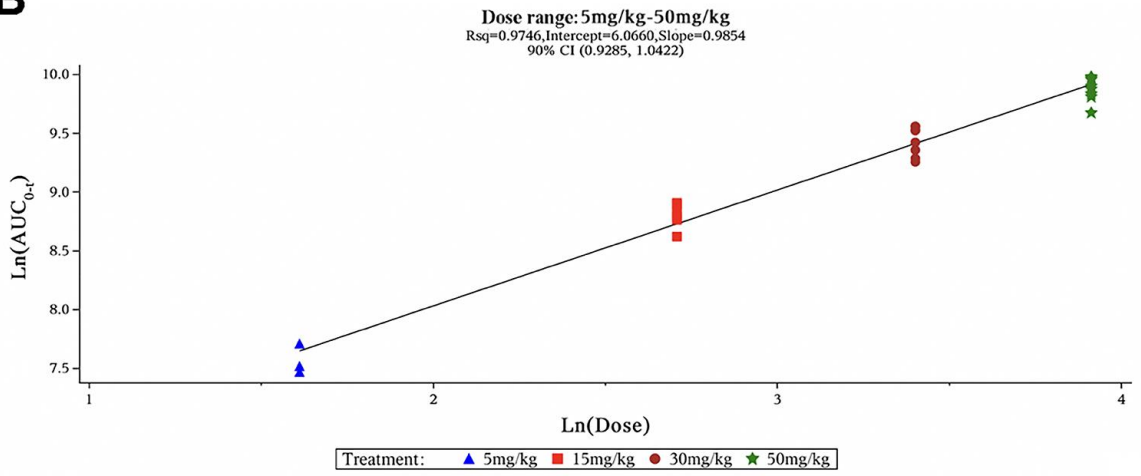**Supplementary Figure 2**
